# Supplementary material for: Selective biocatalytic deacylation studies on furanose triesters: a novel and efficient approach towards bicyclonucleosides
Source: Royal Society of Chemistry journal article supplement (doi:10.1039/b711455a), 2007-01-01
Supplement: b711455a.pdf [file b711455a.pdf]

## SUPPLEMENTARY INFORMATION

### Selective Biocatalytic Deacylation Studies on Furanose Triesters: A Novel and Efficient Approach Towards Bicyclonucleosides<sup>1</sup>

Ashok K. Prasad,<sup>1\*</sup> Neerja Kalra,<sup>1,5</sup> Yogesh Yadav,<sup>1</sup> Sunil K. Singh,<sup>1</sup> Sunil K. Sharma,<sup>1</sup> Shamkant Patkar,<sup>2</sup> Lene Lange,<sup>3</sup> Carl E. Olsen,<sup>4</sup> Jesper Wengel<sup>5</sup> and Virinder S. Parmar<sup>1\*</sup>

<sup>1</sup>Bioorganic Laboratory, Department of Chemistry, University of Delhi, Delhi 110 007, India; <sup>2</sup>Novozymes A/S, Smørumsevej 25, DK-2880 Bagsvaerd, Denmark; <sup>3</sup>Department of Molecular Biology, University of Copenhagen, Ole Maaloes Vej 5, DK- 2200 Copenhagen N, Denmark; <sup>4</sup>University of Copenhagen, Faculty of Life Sciences, Department of Natural Sciences, DK-1871 Frederiksberg C, Denmark; <sup>5</sup>Nucleic Acid Center, Department of Physics and Chemistry, University of Southern Denmark, Campusvej 55, DK-5230 Odense M, Denmark  
e-mail: [ashokenzyme@yahoo.com](mailto:ashokenzyme@yahoo.com)

The characterization data of the compounds **2b-c**, **3b-c** and **9b-d** have been disclosed here.

**3,5-Di-*O*-propanoyl-1,2-*O*-(1-methylethylidene)-4-*C*-propanoyloxymethyl- $\beta$ -L-threo-pentofuranose (2b):** It was obtained as a colorless oil (2.8 g; 80 %). <sup>1</sup>H NMR (CDCl<sub>3</sub>, 300 MHz):  $\delta$  5.91 (d, *J* = 4.0 Hz, 1H), 5.30 (s, 1H), 4.53 (dd, *J* = 1.0 and 4.0 Hz, 1H), 4.31-4.18 (m, 3H), 4.02 (d, *J* = 11.6 Hz, 1H), 2.33-2.23 (m, 6H), 1.53 (s, 3H), 1.26 (s, 3H), 1.10-1.03 (m, 9H); <sup>13</sup>C NMR (CDCl<sub>3</sub>, 75.5 MHz):  $\delta$  172.66, 172.56, 171.68, 112.53, 104.24, 84.84, 76.23, 62.23, 61.46, 28.67, 26.47, 26.33, 25.78, 25.34, 8.00, 7.93, 7.87; IR (thin film) 2985, 2945, 1746, 1462, 1423, 1381, 1164, 1082, 1019, 882, 808 cm<sup>-1</sup>; HRMS *m/z* calculated for [C<sub>18</sub>H<sub>28</sub>O<sub>9</sub>Na]<sup>+</sup> 411.1631, observed 411.1652.

**4-*C*-Butanoyloxymethyl-3,5-di-*O*-butanoyl-1,2-*O*-(1-methylethylidene)- $\beta$ -L-threo-pentofuranose (2c):** It was obtained as a colorless oil (3.2 g; 82 %). <sup>1</sup>H NMR (CDCl<sub>3</sub>, 300 MHz):  $\delta$  5.97 (d, *J* = 3.9 Hz, 1H), 5.35 (s, 1H), 4.58 (d, *J* = 3.9 Hz, 1H), 4.32 (d, *J* = 7.8 Hz, 1H), 4.29 (d, *J* = 7.8 Hz, 1H), 4.27 (d, *J* = 11.6 Hz, 1H), 4.07 (d, *J* = 11.6 Hz, 1H), 2.34-2.27 (m, 6H), 1.68-1.60 (m, 9H), 1.33 (s, 3H), 0.98-0.91 (m, 9H); <sup>13</sup>C NMR (CDCl<sub>3</sub>, 75.5 MHz):  $\delta$  173.23, 173.15, 172.26, 113.91, 105.61, 86.25, 86.14, 77.60, 63.53, 62.83, 36.41, 36.29, 36.18, 36.06, 27.15, 26.71, 18.66, 18.60, 13.95; IR (thin film) 2967,

2878, 1745, 1461, 1418, 1383, 1305, 1250, 1165, 1078, 1016, 862  $\text{cm}^{-1}$ ; HRMS  $m/z$  calculated for  $[\text{C}_{21}\text{H}_{34}\text{O}_9\text{Na}]^+$  453.2101, observed 453.2133.

**3,5-Di-*O*-propanoyl-4-*C*-hydroxymethyl-1,2-*O*-(1-methylethylidene)- $\alpha$ -D-xylo-pentofuranose (3b):** It was obtained as a colorless oil (876 mg; 88 %).  $^1\text{H}$  NMR ( $\text{CDCl}_3$ , 300 MHz):  $\delta$  5.91 (d,  $J = 3.74$  Hz, 1H), 5.22 (s, 1H), 4.56 (brs, 1H), 4.18 (d,  $J = 11.4$  Hz, 1H), 4.04 (d,  $J = 11.4$  Hz, 1H), 3.75 (d,  $J = 11.8$  Hz, 1H), 3.65 (d,  $J = 11.8$  Hz, 1H), 2.28-2.26 (m, 5H), 1.50 (s, 3H), 1.26 (s, 3H), 1.09-1.04 (m, 6H);  $^{13}\text{C}$  NMR ( $\text{CDCl}_3$ , 75.5 MHz):  $\delta$  172.79, 172.09, 112.32, 103.88, 86.93, 85.00, 76.33, 61.67, 61.17, 28.68, 26.36, 25.92, 25.40, 8.02, 7.85; IR (thin film) 3506, 2984, 2943, 1745, 1462, 1380, 1351, 1325, 1263, 1164, 1079, 1018, 882  $\text{cm}^{-1}$ ; HRMS  $m/z$  calculated for  $[\text{C}_{15}\text{H}_{24}\text{O}_8\text{Na}]^+$  355.1369, observed 355.1367.

**3,5-Di-*O*-butanoyl-4-*C*-hydroxymethyl-1,2-*O*-(1-methylethylidene)- $\alpha$ -D-xylo-pentofuranose (3c):** It was obtained as a colorless oil (1.0 g; 93 %).  $^1\text{H}$  NMR ( $\text{CDCl}_3$ , 300 MHz):  $\delta$  5.90 (d,  $J = 4.1$  Hz, 1H), 5.22 (s, 1H), 4.57-4.55 (m, 1H), 4.18 (d,  $J = 11.4$  Hz, 1H), 4.02 (d,  $J = 11.4$  Hz, 1H), 3.74 (d,  $J = 11.9$  Hz, 1H), 3.66 (d,  $J = 11.9$  Hz, 1H), 2.40 (brs, 1H), 2.26-2.20 (m, 4H), 1.61-1.53 (m, 4H), 1.51 (s, 3H), 1.26 (s, 3H), 0.88 (t,  $J = 7.3$  Hz, 6H);  $^{13}\text{C}$  NMR ( $\text{CDCl}_3$ , 75.5 MHz):  $\delta$  172.03, 171.34, 112.35, 103.88, 86.85, 85.19, 76.37, 61.65, 61.25, 35.09, 34.86, 28.69, 25.95, 25.45, 17.35, 17.23, 12.62; IR (thin film) 3435, 2927, 2360, 1742, 1381, 1163, 1076  $\text{cm}^{-1}$ ; HRMS  $m/z$  calculated for  $[\text{C}_{17}\text{H}_{28}\text{O}_8\text{Na}]^+$  383.1682, observed 383.1660.

**3-*O*-Acetyl-4-*C*-acetoxymethyl-5-*O*-butanoyl-1,2-*O*-(1-methylethylidene)- $\beta$ -L-arabino-pentofuranose (9b):** It was obtained as a viscous oil (462 mg; 94 %).  $^1\text{H}$  NMR ( $\text{CDCl}_3$ , 300 MHz):  $\delta$  5.98 (d,  $J = 3.9$  Hz, 1H), 5.35 (s, 1H), 4.61 (d,  $J = 3.9$  Hz, 1H), 4.35 (d,  $J = 11.5$  Hz, 1H), 4.28 (t,  $J = 11.2$  Hz, 2H), 4.08 (d,  $J = 11.6$  Hz, 1H), 2.32 (t,  $J = 7.4$  Hz, 2H), 2.11 (s, 3H), 2.07 (s, 3H), 1.64 (m, 2H), 1.60 (s, 3H), 1.33 (s, 3H), 0.94 (t,  $J = 7.4$  Hz, 3H);  $^{13}\text{C}$  NMR ( $\text{CDCl}_3$ , 75.5 MHz):  $\delta$  173.2, 170.56, 169.62, 113.80, 105.59, 86.00, 77.07, 63.28, 62.82, 36.23, 27.02, 26.56, 21.11, 20.94, 18.61, 13.90, 13.74; IR (thin film) 2993, 2948,

1751, 1736, 1461, 1432, 1391, 1373, 1235, 1166, 1117, 1079, 1026, 903, 851  $\text{cm}^{-1}$ ; HRMS  $m/z$  calculated for  $[\text{C}_{17}\text{H}_{26}\text{O}_9\text{Na}]^+$  397.1469, observed 397.1466.

**3-*O*-Acetyl-4-*C*-acetoxymethyl-1,2-*O*-(1-methylethylidene)-5-*O*-pentanoyl- $\beta$ -L-**

**arabino-pentofuranose (9c):** It was obtained as a viscous oil (474 mg; 93 %).  $^1\text{H}$  NMR ( $\text{CDCl}_3$ , 300 MHz):  $\delta$  5.97 (d,  $J = 3.5$  Hz, 1H), 5.60 (s, 1H), 4.60 (d,  $J = 2.8$  Hz, 1H), 4.35-4.25 (m, 3H), 4.08 (d,  $J = 11.6$  Hz, 1H), 2.34 (t,  $J = 7.5$  Hz, 2H), 2.10 (s, 3H), 2.07 (s, 3H), 1.60 (br s, 5H), 1.33 (m, 5H), 0.88 (t,  $J = 7.1$  Hz, 3H);  $^{13}\text{C}$  NMR ( $\text{CDCl}_3$ , 75.5 MHz):  $\delta$  173.58, 170.74, 169.78, 113.01, 105.78, 86.22, 77.86, 63.53, 63.04, 34.27, 34.17, 27.35, 27.24, 26.77, 22.69, 21.41, 21.13, 14.17; IR (thin film) 2993, 2948, 1751, 1736, 1461, 1432, 1391, 1373, 1235, 1166, 1117, 1079, 1026, 903, 851  $\text{cm}^{-1}$ ; HRMS  $m/z$  calculated for  $[\text{C}_{18}\text{H}_{28}\text{O}_9\text{Na}]^+$  411.1626, observed 411.1615.

**3-*O*-Acetyl-4-*C*-acetoxymethyl-5-*O*-benzoyl-1,2-*O*-(1-methylethylidene)- $\beta$ -L-arabino-**

**pentofuranose (9d):** It was obtained as a viscous oil (504 mg; 94 %).  $^1\text{H}$  NMR ( $\text{CDCl}_3$ , 300 MHz):  $\delta$  8.03 (d,  $J = 7.5$  Hz, 2H), 7.54 (d,  $J = 7.1$ , 1H), 7.44 (d,  $J = 7.6$  Hz, 2H), 6.02 (d,  $J = 3.5$  Hz, 1H), 5.51 (s, 1H), 4.65-4.54 (m, 3H), 4.34 (d,  $J = 11.6$  Hz, 1H), 4.21 (d,  $J = 11.6$  Hz, 1H), 2.12 (s, 3H), 2.05 (s, 3H), 1.61 (s, 3H), 1.33 (s, 3H);  $^{13}\text{C}$  NMR ( $\text{CDCl}_3$ , 75.5 MHz):  $\delta$  169.00, 168.00, 164.00, 132.05, 128.55, 127.24, 112.23, 104.17, 84.79, 84.40, 76.09, 62.42, 61.40, 25.47, 24.87, 19.56, 19.40; IR (thin film) 2993, 2948, 1751, 1736, 1461, 1432, 1391, 1373, 1235, 1166, 1117, 1079, 1026, 903, 851  $\text{cm}^{-1}$ ; HRMS  $m/z$  calculated for  $[\text{C}_{20}\text{H}_{24}\text{O}_9\text{Na}]^+$  431.1313, observed 431.1294.
